# Supplementary material for: The role of Pitx2 and Pitx3 in muscle stem cells gives new insights into P38α MAP kinase and redox regulation of muscle regeneration
Source: eLife. 2018 Aug 14;7:e32991. doi: 10.7554/eLife.32991 (PMC6191287; doi:10.7554/eLife.32991)
Supplement: Figure 1—figure supplement 1—source data 1. [file elife-32991-fig1-figsupp1-data1.xlsx]

## Sheet: Feuil1
Sup_Fig1B
		Myogenin (Pax3GFP/+ mice)
		Mean	SD	N
	Q	0.944	0.0514	3
	Mdx	7.326	2.006	3
	P8	11.685	1.089	3
	Pax3(GFP)-positive cells were purified from diaphragm, pectoralis and abdominal muscles obtained from adult Pax3GFP/+ (Q) and Pax3GFP/+:mdx (Mdx) animals and Day Postnatal 8 Pax3GFP/+ (P8) animals
	Each Experiment was done with Pax3(GFP)-positive cells purified from 3 independant animals (biological triplicates)
	Each N correspond to qPCR performed for Myogenin in triplicate (experimental triplicate).
	Normalization was done with Hprt.
Sup_Fig1D
		Cell Rox (Pax3GFP/+ mice)
		Mean	SD	N
	Q	3.76	1	6
	Mdx	15.2	4	6
	P8	11.3	2	7
	Pax3(GFP)-positive cells were purified from diaphragm, pectoralis and abdominal muscles obtained from adult Pax3GFP/+ (Q) and Pax3GFP/+:mdx (Mdx) animals and Day Postnatal 8 Pax3GFP/+ (P8) animals
	Each Experiment was done with Pax3(GFP)-positive cells purified from 3 independant animals (biological triplicates)
	Each N corresponds to the mean Cell Rox fluorescence intensity for one animal

## Sheet: Feuil2
Sup_Fig1G
		OCR/ECAR
		D2	D3	D4
	basal	0.809	2.39	5.722
	maximal	1.656	4.185	5.454
	Pax3(GFP)-positive cells were purified from diaphragm, pectoralis and abdominal muscles obtained from adult Pax3GFP/+ animals
	Each Experiment was done with Pax3(GFP)-positive cells purified from 3 independant animals (biological triplicates) and cultured for 2 to 4 days
	Using an XFe24 Seahorse analyser, OCR and ECAR were quantified simultaneously in control conditions (basal), or after FCCP and oligomycin dual injection (maximal)
	For each animal and each time point, OCR and ECAR were quantified in three independant wells of the 24 well plates (experimental triplicates)
	Normalization was done for each well with protein concentration (quantified by Bradford analysis).
																			20

## Sheet: Feuil3
Sup_Fig1H
		Amplex Red (H2O2 production)
		Mean	SD	N
	D0	0.09	0.004	3
	D2	0.167	0.02	3
	D3	0.292	0.015	3
	Pax3(GFP)-positive cells were purified from diaphragm, pectoralis and abdominal muscles obtained from adult Pax3GFP/+ animals
	Each Experiment was done with Pax3(GFP)-positive cells purified from 3 independant animals (biological triplicates)
	Pax3(GFP)-positive cells were freshly purified or have been cultured for 2 or 3 days.
	Each N correspond to H2O2 quantification in three different wells (experimental triplicates).

## Sheet: Feuil4
Sup_Fig1J
		Pitx2 (Pax3GFP/+ mice)			Pitx3 (Pax3GFP/+ mice)			Myogenin (Pax3GFP/+ mice)
		Mean	SD	N	Mean	SD	N	Mean	SD	N
	D2	0.727	0.006	3	4.483	1.619	3	0.108	0.009	3
	D3	6.135	0.946	3	15.531	2.882	3	0.574	0.043	3
	D4	3.492	0.716	3	8.862	2.065	3	10.252	1.165	3
	D5	2.988	0.087	3	7.888	2.945	3	13.061	2.467	3
	Pax3(GFP)-positive cells were purified from diaphragm, pectoralis and abdominal muscles obtained from adult Pax3GFP/+ animals
	Each Experiment was done with Pax3(GFP)-positive cells purified from 3 independant animals (biological triplicates) and cultured for 2 to 5 days
	Each N correspond to qPCR performed for each gene in triplicate (experimental triplicates).
	Normalization was done with Hprt for each case.
Sup_Fig1M
		Pax3GFP/+ mice			Pitx2+/-:Pitx3+/-:Pax3GFP/+ mice
		Mean	SD	N	Mean	SD	N
	D0	4.1525	0.696054	5	3.76	0.41	3
	D2	8.4	0.944763	6	10.9	2.34	3
	D3	16	4.35086	5	20.4	3.97	3
