# Supplementary material for: The role of Pitx2 and Pitx3 in muscle stem cells gives new insights into P38α MAP kinase and redox regulation of muscle regeneration
Source: eLife. 2018 Aug 14;7:e32991. doi: 10.7554/eLife.32991 (PMC6191287; doi:10.7554/eLife.32991)
Supplement: Figure 1—source data 1. [file elife-32991-fig1-data1.xlsx]

## Sheet: Feuil1
Fig1C Mitotracker staining
	Mitotracker CMXRos (Pax3GFP/+ mice)
	Mean	SD	N
D0	2.082	0.832	6
D2	4.4	1.039	7
D3	8.2	1.896	6
D4	12	2.098	6
	Experiments were done with N≥6 independant animals
	Each N correspond to a minimum of 20 000 cells purified by facs and immediatly used for Mitotracker Red CMXRos staining.
	When necessary, more than 1 animal was used to obtain 20 000 cells

## Sheet: Feuil2
Fig1D qPCR
		COI/NDUFV1 (Pax3GFP/+ mice)
		Mean	SD	N
	D0	52.26	12.31	4
	D2	97.43	8.56	4
	D3	148.43	27.75	4
	Experiments were done with 4 independant samples obtained for independant animals
	Each N correspond to a minimum of 15 000 cells purified by facs and used for DNA purification
	If necessary, more than 1 animal was used to obtain 15 000 cells
	Normalization of mitochondrial DNA (COI) was done in each case with nuclear DNA (NDUFV1)

## Sheet: Feuil3
Fig1E qPCR
	Pax7 (Pax3GFP/+ mice)
	Mean	SD	N
D0	7.56	1.12	6
D2	8.032	1.44	6
D3	4.13	0.95	6
D4	2.206	0.73	6
	Myogenin (Pax3GFP/+ mice)
	Mean	SD	N
D0	0.508	0.075	6
D2	1.046	0.26	6
D3	8.04	1.06	6
D4	13.061	1.084	6
	Experiments were done with 6 independant samples obtained for independant animals
	Each N correspond to a minimum of 15 000 cells purified by facs and used for RNA purification
	If necessary, more than 1 animal was used to obtain 15 000 cells
	Normalization was done with Hprt in each case.

## Sheet: Feuil4
Fig1F Mitosox Staining
		Mitosox (Pax3GFP/+ mice)
		Mean	SD	N
	D0	220.25	37.526	6
	D2	383	32.787	6
	D3	356	41.603	6
	D4	298.5	19.091	6
	D5	230.08	21.255	6
	Each N correspond to a minimum of 20 000 cells purified by facs and immediatly used for Mitosox staining.
	When necessary, more than 1 animal was used to obtain 20 000 cells

## Sheet: Feuil5
Fig1G CellROX Staining
		CellROX (Pax3GFP/+ mice)		GFP (Pax3GFP/+ mice)
	Days	Mean	SD	Mean	SD	N
	D0	4.152	0.696	17.8	3.187	6
	D2	8.4	0.944	9.34	1.004	6
	D3	16	4.35	6.73	0.723	6
	D4	12.4	2.251	5.41	0.8	6
	D5	9.822	1.255	14.05	1.893	6
	D7	6.825	0.53	16.23	2.001	6
	Experiments were done with the N=6 independant animals
	Each N correspond to a minimum of 20 000 cells purified by facs and immediatly used for CellRox staining.
	When necessary, more than 1 animal was used to obtain 20 000 cells

## Sheet: Feuil6
Fig1H qPCR
	Pitx2 (Pax3GFP/+ mice)
	Mean	SD	N
D0	3.69	0.96	6
D2	6.76902	1.342	6
D3	7.61005	1.463	6
D4	6.82066	0.993	6
	Pitx3 (Pax3GFP/+ mice)
	Mean	SD	N
D0	0.973927	0.761	6
D2	5.97364	1.033	6
D3	9.43318	1.701	6
D4	9.841	1.447	6
	Experiments were done with 6 independant samples obtained for independant animals
	Each N correspond to a minimum of 15 000 cells purified by facs and used for RNA purification
	If necessary, more than 1 animal was used to obtain 15 000 cells
	Normalization was done with Hprt in each case.

## Sheet: Feuil7
Fig1J CellROX Staining on Pitx2/3 mutants
		Control mice			Pitx2 mutant mice			Pitx3 mutant mice			Pitx2/Pitx3 mutant mice
	Days	Mean	SD	N	Mean	SD	N	Mean	SD	N	Mean	SD	N
	D0	3.76	0.41	6	3.82	0.8	6	3.94	1.03	6	4.52	1.68	6
	D2	10.9	2.34	6	20.97	3.29	6	28.1	3.41	6	15.43	6.02	6
	D3	20.4	3.97	6	24.31	5.67	6	32.06	4.96	6	21.04	2.94	6
	Experiments were done with the N=6 independant animals
	Each N correspond to a minimum of 20 000 cells purified by facs and immediatly used for CellRox staining.
	When necessary, more than 1 animal was used to obtain 20 000 cells
	Control = Pitx2flox/+:Pitx3+/-:Pax3GFP/+:R26RCre-ERT2/+
	Pitx2 mutant = Pitx2flox/flox: Pax3GFP/+:R26RCre-ERT2/+
	Pitx3 mutant = Pitx3-/-: Pax3GFP/+
	Pitx2/3 mutant = Pitx2flox/flox: Pitx3flox/-:Pax3GFP/+: R26RCre-ERT2/+
