# Supplementary material for: The role of Pitx2 and Pitx3 in muscle stem cells gives new insights into P38α MAP kinase and redox regulation of muscle regeneration
Source: eLife. 2018 Aug 14;7:e32991. doi: 10.7554/eLife.32991 (PMC6191287; doi:10.7554/eLife.32991)
Supplement: Figure 2—figure supplement 1—source data 1. [file elife-32991-fig2-figsupp1-data1.xlsx]

## Sheet: Feuil1
Sup_Fig2A
		Ctrl Pitx3+/-			Mutant Pitx3-/-
	Age (Days)	Mean	SD	N	Mean	SD	N
	2	2.45	0.07	6	2.45	0.07	6
	10	5.2	0.1	6	4.1	0.1	6
	15	8.375	0.567	6	5.725	0.377	6
	20	13.43	1.107	6	8.32	1.477	6
	25	14.05	1.147	6	8.56	1.302	6
	30	18.65	0.68	6	11.075	1.41	6
	35	20.625	0.78	6	13.075	1.59	6
	Experiments were obtained from 6 independant animals of each genotype that were weighted from day postnatal 2 to 35

## Sheet: Feuil2
Sup_Fig2C
		Ctrl Pitx3+/-			Mutant Pitx3-/-
		Mean	SD	N	Mean	SD	N
	CSA (P15)	794.446	83.981	3	329.167	20.908	3
	Experiments were done with Tibialis Anterior obtained from 3 independant animals of each genotype
	Each N correspond to the mean fibre CSA counted on a minimum of 6 sections at different levels along the muscle. An average of 300 fibres were measured for each animal
	All animals were 15 days-old males

## Sheet: Feuil3
Sup_Fig2D
		Ctrl Pitx3+/-			Mutant Pitx3-/-
	CSA (10-5M2)	Mean	SD	N	Mean	SD	N
	0-50	0	0	3	45.05	13.788	3
	50-70	6.603	6.774	3	40.65	14.935	3
	70-90	22.64	10.797	3	12.82	1.369	3
	≥ 90	70.75	17.578	3	1.46	0.457	3
	Experiments were done with Tibialis Anterior obtained from 3 independant animals of each genotype
	Each N corresponds to the mean number of fibres that belongs to each category
	Fibers CSA were measured on a minimum of 6 sections at different levels along the injured muscle. An average of 300 fibres were measured for each animal
	All animals were male of similar age
Sup_Fig2E
		Ctrl Pitx3+/-			Mutant Pitx3-/-
	CSA (10-5M2)	Mean	SD	N	Mean	SD	N
	0-50	0	0	3	54.23	19.95	3
	50-70	8.24	3.56	3	44.03	8.35	3
	70-90	29.78	8.21	3	1.74	0.85	3
	≥ 90	61.98	13.98	3	0	0	3
	Experiments were done with Tibialis Anterior obtained from 3 independant animals of each genotype
	Each N corresponds to the mean number of fibres that belongs to each category
	Fibers CSA were measured on a minimum of 6 sections at different levels along the injured muscle. An average of 300 fibres were measured for each animal
	All animals were male of similar age
