# Supplementary material for: The role of Pitx2 and Pitx3 in muscle stem cells gives new insights into P38α MAP kinase and redox regulation of muscle regeneration
Source: eLife. 2018 Aug 14;7:e32991. doi: 10.7554/eLife.32991 (PMC6191287; doi:10.7554/eLife.32991)
Supplement: Figure 2—source data 1. [file elife-32991-fig2-data1.xlsx]

## Sheet: Feuil1
Fig2B
		Ctrl Pitx3+/-			Mutant Pitx3-/-
	CSA:	Mean	SD	N	Mean	SD	N
	Uninjured	1010	82	4	560	24	4
	D21 PI	892.83	66.87	3	332.529	16.83	3
	Experiments were done with Tibialis Anterior obtained from the indicated N of independant animals of each genotype
	Each N correspond to the mean fibre CSA counted on a minimum of 6 sections at different levels along the muscle. An average of 400 fibres were measured for each animal
	All animals were males of similar age

## Sheet: Feuil2
Fig2C
	Ctrl Pitx3+/-			Mutant Pitx3-/-
	Mean	SD	N	Mean	SD	N
n=1	563.74	21.08	3	726	24.5	3
n≥2	263.2	19.5	3	101	12.03	3
	Experiments were done with Tibialis Anterior obtained from 3 independant animals of each genotype
	Each N correspond to the mean number of centro-nucleated myofiber in which 1 or 2 and more nuclei were counted.
	A minimum of 3 sections were used at different levels along the injured muscle
	An average of 800 fibres were used for each animal
	All animals were males of similar age

## Sheet: Feuil3
Fig2E
	Ctrl Pitx3+/-			Mutant Pitx3-/-
	Mean	SD	N	Mean	SD	N
Pax7/EdU+	77.8	8.9	3	32.8	4.8	3
	Experiments were done with Tibialis Anterior obtained from 3 independant animals of each genotype
	Each N correspond to the % of Pax7/EdU-double positive cells among the whole population of Pax7-positive cells.
	A minimum of 10 sections were used at different levels along the injured muscle
	All animals were males of same age

## Sheet: Feuil4
Fig2F
	Ctrl Pitx3+/-			Mutant Pitx3-/-
	Mean	SD	N	Mean	SD	N
Myogenin	13	1.5	3	25	2.5	3
embMyHC	8	0.64	3	19	3.93	3
	Experiments were done with Tibialis Anterior obtained from 3 independant animals of each genotype
	Each N correspond to the mean number of cells positive for Myogenin or embMyHC expression, that were counted per field using 10X objectif
	An minimum of 10 sections were used at different levels along the injured muscle
	All animals were males of similar age

## Sheet: Feuil5
Fig2I
	Ctrl Pitx3+/-			Mutant Pitx3-/-
	Mean	SD	N	Mean	SD	N
Uninjured	1031.12	117.038	3	993.62	91	3
D63	540.25	22.1056	3	239.86	64	3
	Experiments were done with Tibialis Anterior obtained from 3 independant animals of each genotype
	Each N correspond to the mean fibre CSA counted on a minimum of 6 sections at different levels along the muscle. An average of 400 fibres were measured for each animal
	All animals were males of similar age

## Sheet: Feuil6
Fig2J
	Ctrl Pitx3+/-			Mutant Pitx3-/-
	Mean	SD	N	Mean	SD	N
Pax7+ cells/field	28	2.5	3	12	2.1	3
	Experiments were done with Tibialis Anterior obtained from 3 independant animals of each genotype
	Each N correspond to the mean number of cells positive for Pax7 expression that were counted per field using 10X objectif
	A minimum of 10 sections were used at different levels along the injured muscle
	All animals were males of similar age
