# Supplementary material for: The role of Pitx2 and Pitx3 in muscle stem cells gives new insights into P38α MAP kinase and redox regulation of muscle regeneration
Source: eLife. 2018 Aug 14;7:e32991. doi: 10.7554/eLife.32991 (PMC6191287; doi:10.7554/eLife.32991)
Supplement: Figure 3—figure supplement 1—source data 1. [file elife-32991-fig3-figsupp1-data1.xlsx]

## Sheet: Feuil1
Sup_Fig3C
		Pitx3+/-:Pax3GFP/+			Pitx3-/-:Pax3GFP/+
	D3	Mean	SD	N	Mean	SD	N
	Myogenin	3.2	2.5	3	37	4.4	3
	Pax3(GFP)-positive cells were purified from diaphragm, pectoralis and abdominal muscles obtained from both genotypes
	Each Experiment was done with Pax3(GFP)-positive cells purified from 3 independant animals (biological triplicates)
	All animals were females of same age (6 to 8 weeks-old)
	Each N correspond to the mean % of cells that were counted positive for Myogenin expression after 3 days of culture.
	For each N, counting was done on three different plates (experimental triplicates)

## Sheet: Feuil2
Sup_Fig3E
		Pitx3+/-:Pax3GFP/+			Pitx3-/-:Pax3GFP/+
	D4	Mean	SD	N	Mean	SD	N
	Myogenin	36	3.5	3	66	1.8	3
	Troponin T	17.9	4.5	3	55	2.8	3
	Pax3(GFP)-positive cells were purified from diaphragm, pectoralis and abdominal muscles obtained from both genotypes
	Each Experiment was done with Pax3(GFP)-positive cells purified from 3 independant animals (biological triplicates)
	All animals were females of same age (6 to 8 weeks-old)
	Each N correspond to the mean % of cells that were counted positive for Myogenin or for Troponin T expression after 4 days of culture.
	For each N, counting was done on three different plates (experimental triplicates)

## Sheet: Feuil3
Sup_Fig3F
		Pitx3+/-:Pax3GFP/+			Pitx3-/-:Pax3GFP/+			Pitx3-/-:Pax3GFP/+ + NAC			Pitx3-/-:Pax3GFP/+ + Trolox
	D3	Mean	SD	N	Mean	SD	N	Mean	SD	N	Mean	SD	N
	Cell Rox	9.23	1.34	3	14.936	0.915	3	7.64	1.92	3	11.69	2.14	3
	Pax3(GFP)-positive cells were purified from diaphragm, pectoralis and abdominal muscles obtained from both genotypes
	Each Experiment was done with Pax3(GFP)-positive cells purified from 3 independant animals (biological triplicates) and cultured for 3 days in absence or presence of NAC or Trolox
	For each condition, 2 plates were used for independant Cell Rox quantification (experimental duplicates)
	Each N corresponds to the mean Cell Rox fluorescence intensity for one animal
	All animals were females of similar age (6 to 8 weeks-old)

## Sheet: Feuil4
Sup_Fig3G
		Pitx3-/-:Pax3GFP/+ 3% O2			Pitx3-/-:Pax3GFP/+ 3% O2 + NAC
	D3	Mean	SD	N	Mean	SD	N
	EdU	16.63	2.69	3	39.97	4.68	3
	Myogenin	42.41	5.07	3	16.34	3.27	3
	Pax3(GFP)-positive cells were purified from diaphragm, pectoralis and abdominal muscles obtained from Pitx3-/-:Pax3GFP/+ animals
	Each Experiment was done with Pax3(GFP)-positive cells purified from 3 independant animals (biological triplicates) and cultured for 3 days under 3%O2 in absence or in presence of NAC
	Each N correspond to the mean % of cells that were counted positive for EdU or for Myogenin expression after 3 days of culture.
	For each N, counting was done on three different plates (experimental triplicates)
	All animals were females of similar age (6 to 8 weeks-old)

## Sheet: Feuil5
Sup_Fig3H(ii)
		Pitx3+/-:Pax3GFP/+			Pitx3-/-:Pax3GFP/+
	ERK	Mean	SD	N	Mean	SD	N
	pERK	1.46339	0.288495	3	1.23005	0.3472	3
	Pax3(GFP)-positive cells were purified from diaphragm, pectoralis and abdominal muscles obtained from both genotypes
	Each Experiment was done with Pax3(GFP)-positive cells purified from 3 independant animals (biological triplicates) and cultured for 3 days
	All animals were females of same age (6 to 8 weeks-old)
Sup_Fig3I(ii)
		Pitx3+/-:Pax3GFP/+			Pitx3-/-:Pax3GFP/+
	JUNK	Mean	SD	N	Mean	SD	N
	pJUNK	1.183	0.2062	3	1.09464	0.2905	3
	Pax3(GFP)-positive cells were purified from diaphragm, pectoralis and abdominal muscles obtained from both genotypes
	Each Experiment was done with Pax3(GFP)-positive cells purified from 3 independant animals (biological triplicates) and cultured for 3 days
	All animals were females of same age (6 to 8 weeks-old)

## Sheet: Feuil6
Sup_Fig3J
		Pitx3+/-:Pax3GFP/+			Pitx3-/-:Pax3GFP/++TNFalpha
	D3	Mean	SD	N	Mean	SD	N
	Control	10.3	1.28	3	14.63	1.14	3
	TNFalpha	16.67	2.11	3	20.15	2.44	3
	Pax3(GFP)-positive cells were purified from diaphragm, pectoralis and abdominal muscles obtained from both genotypes
	Each Experiment was done with Pax3(GFP)-positive cells purified from 3 independant animals (biological triplicates) and cultured for 3 days in absence or presence of 0.5nM TNFalpha added at day 2
	For each condition, 2 plates were used for independant Cell Rox quantification (experimental duplicates)
	Each N corresponds to the mean Cell Rox fluorescence intensity for one animal
	All animals were females of similar age (6 to 8 weeks-old)
