# Supplementary material for: The role of Pitx2 and Pitx3 in muscle stem cells gives new insights into P38α MAP kinase and redox regulation of muscle regeneration
Source: eLife. 2018 Aug 14;7:e32991. doi: 10.7554/eLife.32991 (PMC6191287; doi:10.7554/eLife.32991)
Supplement: Figure 3—figure supplement 2—source data 1. [file elife-32991-fig3-figsupp2-data1.xlsx]

## Sheet: Feuil1
Sup_Fig3A
		UCP2
	D3	Mean	SD	N
	siControl	0.674	0.102	3
	siUCP2	0.245	0.081	3
	Pax3(GFP)-positive cells were purified from diaphragm, pectoralis and abdominal muscles obtained from adult Pax3GFP/+ animals
	Each Experiment was done with Pax3(GFP)-positive cells purified from 3 independant animals (biological triplicates) and transfected with siControl or siUCP2.
	Each N correspond to qPCR performed for UCP2 in triplicate (experimental triplicates).
	Normalization was done with Hprt.
Sup_Fig3B
		Mitotracker
	D3	Mean	SD	N
	siControl	58.031	9.85	3
	siUCP2	51.421	7.723	3
	Pax3(GFP)-positive cells were purified from diaphragm, pectoralis and abdominal muscles obtained from adult Pax3GFP/+ animals
	Each Experiment was done with Pax3(GFP)-positive cells purified from 3 independant animals (biological triplicates) and transfected with siControl or siUCP2.
	For each N, transfections were performed in triplicate (experimental triplicates).
	Each N corresponds to the mean Mitotracker fluorescence intensity for one animal

## Sheet: Feuil2
Sup_Fig3D
		Tfam
	D3	Mean	SD	N
	siControl	0.84	0.061	3
	siTfam	0.37	0.052	3
	Pax3(GFP)-positive cells were purified from diaphragm, pectoralis and abdominal muscles obtained from adult Pax3GFP/+ animals
	Each Experiment was done with Pax3(GFP)-positive cells purified from 3 independant animals (biological triplicates) and transfected with siControl or siTfam
	Each N correspond to qPCR performed for Tfam in triplicate (experimental triplicates).
	Normalization was done with Hprt.
Sup_Fig3E
		Myogenin			EdU
	D3	Mean	SD	N	Mean	SD	N
	siControl	30.6397	4.8208	3	18.8552	2.064	3
	siTfam	10.274	1.4429	3	29.7945	3.5519	3
	Pax3(GFP)-positive cells were purified from diaphragm, pectoralis and abdominal muscles obtained from adult Pax3GFP/+ animals
	Each Experiment was done with Pax3(GFP)-positive cells purified from 3 independant animals (biological triplicates) and transfected with siControl or siTfam
	For each N, transfections were performed in triplicate (experimental triplicates).
	Each N correspond to the mean % of cells that were counted positive for EdU incorporation or for Myogenin expression after 4 days of culture.
	For each N, counting was done on three different plates (experimental triplicates)

## Sheet: Feuil3
Sup_Fig3F
		Nox2			Nox4
	Days	Mean	SD	N	Mean	SD	N
	D0	0.15	0.03	3	0.32	0.061	3
	D2	1.83	0.14	3	0.94	0.11	3
	D3	2.21	0.31	3	1.28	0.377	3
	D4	2.034	0.54	3	1.36	0.29	3
	Pax3(GFP)-positive cells were purified from pectoralis obtained from adult Pax3GFP/+ animals
	Each Experiment was done with Pax3(GFP)-positive cells purified from 3 independant animals (biological triplicates).
	Pax3(GFP)-positive cells were freshly purified from uninjured muscle (D0) or from injured muscles, 2, 3 or 4 days (D2-D4) after notexin injection.
	Each N correspond to qPCR performed for each gene in triplicate (experimental triplicates).
	Normalization was done with Hprt for each case.
