# Supplementary material for: The role of Pitx2 and Pitx3 in muscle stem cells gives new insights into P38α MAP kinase and redox regulation of muscle regeneration
Source: eLife. 2018 Aug 14;7:e32991. doi: 10.7554/eLife.32991 (PMC6191287; doi:10.7554/eLife.32991)
Supplement: Figure 3—source data 1. [file elife-32991-fig3-data1.xlsx]

## Sheet: Feuil1
Fig3a
		Pitx3+/-:Pax3GFP/+			Pitx3-/-:Pax3GFP/+			Pitx3-/-:Pax3GFP/+ + NAC			Pitx3-/-:Pax3GFP/+ + Trolox
		Mean	SD	N	Mean	SD	N	Mean	SD	N	Mean	SD	N
	D3 Myogenin			3			3			3			3
	D4 Myogenin			3			3			3			3

## Sheet: Feuil2
Fig3A
		Pitx3+/-:Pax3GFP/+			Pitx3-/-:Pax3GFP/+			Pitx3-/-:Pax3GFP/+ + NAC			Pitx3-/-:Pax3GFP/+ + Trolox
	Myogenin	Mean	SD	N	Mean	SD	N	Mean	SD	N	Mean	SD	N
	D3	3.2	2.5	3	44	4.4	3	6.8	2.91	3	13.01	2.94	3
	D4	36	3.5	3	66	1.8	3	46	3.04	3	52.76	4.17	3
	Pax3(GFP)-positive cells were purified from diaphragm, pectoralis and abdominal muscles obtained from both genotypes
	Each Experiment was done with Pax3(GFP)-positive cells purified from 3 independant animals (biological triplicates) and cultured for 3 and 4 days in absence or presence of NAC or Trolox
	All animals were females of same age (6 to 8 weeks-old)
	Each N correspond to the mean % of cells that were counted positive for Myogenin expression
	For each N, counting was done on three different plates (experimental triplicates)
Fig3B
		Pitx3+/-:Pax3GFP/+			Pitx3-/-:Pax3GFP/+			Pitx3-/-:Pax3GFP/+ + NAC
	D3	Mean	SD	N	Mean	SD	N	Mean	SD	N
	Mean Cell Number/clone	14.8284	2.34343	3	8.73	0.68	3	18.7465	2.16841	3
	Pax3(GFP)-positive cells were purified from diaphragm, pectoralis and abdominal muscles obtained from both genotypes
	Each Experiment was done with Pax3(GFP)-positive cells purified from 3 independant animals (biological triplicates) and cultured in clonal conditions (1 cell/well) in two 96 wells plates per animal
	After 3 days in culture, all clones with n≥2 cells were counted. Each N corresponds to the mean number of cells per clone for one animal
	All animals were females of same age (6 to 8 weeks-old)
Fig3C
		Pitx3+/-:Pax3GFP/+			Pitx3-/-:Pax3GFP/+			Pitx3-/-:Pax3GFP/+ + NAC			Pitx3-/-:Pax3GFP/+ + Trolox
	D3	Mean	SD	N	Mean	SD	N	Mean	SD	N	Mean	SD	N
	EdU	44.96	3.82	6	14.62	3.04	6	43.21	8.28	3	32.52	4.06	3
	p21	37.5	4.44	6	69.29	7.76	6	38.89	9.82	3	49.05	5.27	3
	Pax3(GFP)-positive cells were purified from diaphragm, pectoralis and abdominal muscles obtained from both genotypes
	Each Experiment was done with Pax3(GFP)-positive cells purified from 3 independant animals (biological triplicates)
	All animals were females of same age (6 to 8 weeks-old)
	Each N correspond to the mean % of cells that were counted positive EdU incorporation, or p21 expression after 3 days of culture in absence or presence of NAC or Trolox
	For each N, counting was done on three different plates (experimental triplicates)

## Sheet: Feuil4
Fig3D(ii)
		Pitx3+/-:Pax3GFP/+			Pitx3-/-:Pax3GFP/+
	D3	Mean	SD	N	Mean	SD	N
	pp38a/GAPDH	1	0.08	3	2.8	0.33	3

## Sheet: Feuil5
fig3E
		Control			SB203580
	D3	Mean	SD	N	Mean	SD	N
	Myogenin	27.866	6.539	3	1.467	2.54	3
	Pax3(GFP)-positive cells were purified from diaphragm, pectoralis and abdominal muscles obtained from Pitx3-/-:Pax3GFP/+ animals
	Each Experiment was done with Pax3(GFP)-positive cells purified from 3 independant animals (biological triplicates)
	All animals were females of same age (6 to 8 weeks-old)
	Each N correspond to the mean % of cells that were counted positive for Myogenin expression after 3 days of culture in absence or presence of SB203580
	For each N, counting was done on three different plates (experimental triplicates)
fig3F		SiControl			Sip38a			Sip38g
	D3	Mean	SD	N	Mean	SD	N	Mean	SD	N
	Myogenin	27.057	5.014	3	22.025	3.01	3	8.085	2.845	3
	Pax3(GFP)-positive cells were purified from diaphragm, pectoralis and abdominal muscles obtained from Pitx3-/-:Pax3GFP/+ animals
	Each Experiment was done with Pax3(GFP)-positive cells purified from 3 independant animals (biological triplicates)
	All animals were females of same age (6 to 8 weeks-old)
	Each N correspond to the mean % of cells that were counted positive for Myogenin expression after 3 days of culture in presence of siRNA directed against control, p38alpha and p38gamma mRNAs
	For each N, counting was done on three different plates (experimental triplicates)

## Sheet: Feuil6
Fig3G
		Pitx3+/-:Pax3GFP/+			Pitx3-/-:Pax3GFP/+			Pitx3-/-:Pax3GFP/+ + NAC			Pitx3-/-:Pax3GFP/+ + SB203580
	D3	Mean	SD	N	Mean	SD	N	Mean	SD	N	Mean	SD	N
	pp38a	28.05	3.04	3	50.37	2.86	3	32.8	3.66	3	29.02	1.77	3
	Pax3(GFP)-positive cells were purified from diaphragm, pectoralis and abdominal muscles obtained from both genotypes
	Each Experiment was done with Pax3(GFP)-positive cells purified from 3 independant animals (biological triplicates) and cultured for 3 days in absence or presence of NAC or SB203580
	All animals were females of same age (6 to 8 weeks-old)
	Each N correspond to the mean % of cells that were counted positive for the phosphorylated form of p38a (pp38a)
	For each N, counting was done on three different plates (experimental triplicates)
Fig3J
		Pax3GFP/+			Pax3GFP/+ +TNFalpha			Pax3GFP/+ +TNFalpha +NAC
	D3	Mean	SD	N	Mean	SD	N	Mean	SD	N
	EdU	35.71	3.08	3	22.48	4.47	3	40.86	4.85	3
	Myogenin	7.35	0.77	3	28.72	2.06	3	11.24	1.13	3
	Pax3(GFP)-positive cells were purified from diaphragm, pectoralis and abdominal muscles obtained from both genotypes
	Each Experiment was done with Pax3(GFP)-positive cells purified from 3 independant animals (biological triplicates) and cultured for 3 days in absence or presence of 0.5nM TNFalpha or TNFalpha and NAC, added at day 2
	Each N correspond to the mean % of cells that were counted positive for the phosphorylated form of p38a (pp38a)
	All animals were females of similar age (6 to 8 weeks-old)

## Sheet: Feuil7
Fig3K
		Cell Rox
	D4	Mean	SD	N
	siControl	11.862	1.029	3
	siUCP2	16.685	2.725	3
	Pax3(GFP)-positive cells were purified from diaphragm, pectoralis and abdominal muscles obtained from Pax3GFP/+ animals
	Each Experiment was done with Pax3(GFP)-positive cells purified from 3 independant animals (biological triplicates) and cultured for 4 days in presence of siRNA directed against control or Ucp2 mRNAs.
	For each condition, 2 plates were used for independant Cell Rox quantification (experimental duplicates)
	Each N corresponds to the mean Cell Rox fluorescence intensity for one animal
	All animals were females of same age (6 to 8 weeks-old)
Fig3L		pp38a			Myogenin
	D4	Mean	SD	N	Mean	SD	N
	siControl	20.7	1.74	3	11.34	1.86	3
	siUCP2	31.23	2.86	3	16.21	2.08	3
	Pax3(GFP)-positive cells were purified from diaphragm, pectoralis and abdominal muscles obtained from Pax3GFP/+ animals
	Each Experiment was done with Pax3(GFP)-positive cells purified from 3 independant animals (biological triplicates) and cultured for 4 days in presence of siRNA directed against control or Ucp2 mRNAs.
	Each N correspond to the mean % of cells that were counted positive for the phosphorylated form of p38 (pp38) or for Myogenin expression after 4 days of culture.
	For each N, counting was done on three different plates (experimental triplicates)
	All animals were females of same age (6 to 8 weeks-old)

## Sheet: Feuil11
Fig3M
		Cell Rox
	D4	Mean	SD	N
	Control	28.95	0.919	3
	Apocynin	15.666	2.532	3
	Pax3(GFP)-positive cells were purified from diaphragm, pectoralis and abdominal muscles obtained from Pax3GFP/+ animals
	Each Experiment was done with Pax3(GFP)-positive cells purified from 3 independant animals (biological triplicates) and cultured for 4 days in presence of Apocynin
	For each condition, 2 plates were used for independant Cell Rox quantification (experimental duplicates)
	Each N corresponds to the mean Cell Rox fluorescence intensity for one animal
	All animals were females of same age (6 to 8 weeks-old)
Fig3N		pp38a			Myogenin			EdU
	D4	Mean	SD	N	Mean	SD	N	Mean	SD	N
	Control	58.02	12.24	3	49.48	8.067	3	20.698	2.188	3
	Apocynin	28.78	4.08	3	17.552	1.083	3	32.028	6	3
	Pax3(GFP)-positive cells were purified from diaphragm, pectoralis and abdominal muscles obtained from Pax3GFP/+ animals
	Each Experiment was done with Pax3(GFP)-positive cells purified from 3 independant animals (biological triplicates) and cultured for 4 days in presence of Apocynin
	Each N correspond to the mean % of cells that were counted positive for the phosphorylated form of p38 (pp38), for Myogenin expression or for EdU incorporation after 4 days of culture.
	For each N, counting was done on three different plates (experimental triplicates)
	All animals were females of same age (6 to 8 weeks-old)
