# Supplementary material for: The role of Pitx2 and Pitx3 in muscle stem cells gives new insights into P38α MAP kinase and redox regulation of muscle regeneration
Source: eLife. 2018 Aug 14;7:e32991. doi: 10.7554/eLife.32991 (PMC6191287; doi:10.7554/eLife.32991)
Supplement: Figure 4—source data 1. [file elife-32991-fig4-data1.xlsx]

## Sheet: Feuil1
Fig4D
	Pitx2+/-:Pitx3+/-:Pax7Cre-ERT2/+:mdx/mdx			Pitx2-/-:Pitx3-/-:Pax7Cre-ERT2/+:mdx/mdx			Pitx2-/-:Pitx3-/-:Pax7Cre-ERT2/+:mdx/mdx + NAC
	Mean	SD	N	Mean	SD	N	Mean	SD	N
SA-bgalactosidase/field	8.403	0.651	6	20.733	1.03	5	10.42	0.763	6
	Experiments were done with diaphragms obtained from the indicated N of independant animals of each genotype
	Each N correspond to the mean number of cells positive for SA-bgalactosidase activity that were counted on a minimum of 10 sections at different levels along the diaphragm
	All animals were females of similar age
