# Supplementary material for: The role of Pitx2 and Pitx3 in muscle stem cells gives new insights into P38α MAP kinase and redox regulation of muscle regeneration
Source: eLife. 2018 Aug 14;7:e32991. doi: 10.7554/eLife.32991 (PMC6191287; doi:10.7554/eLife.32991)
Supplement: Figure 5—figure supplement 1—source data 1. [file elife-32991-fig5-figsupp1-data1.xlsx]

## Sheet: Feuil1
Sup_Fig5A
		Pitx2+/-:Pitx3+/-:Pax3GFP/+			Pitx2-/-:Pitx3-/-:Pax3GFP/+
		Mean	SD	N	Mean	SD	N
	Mgst2	1	0	3	2.21	0.33	3
	SelX	1	0	3	1.83	0.21	3
	Hspb2	1	0	3	1.61	0.32	3
	Gstz	1	0	3	0.71	0.028	3
	SelM	1	0	3	0.57	0.084	3
	NRF1	1	0	3	0.64	0.1	3
	Pax3(GFP)-positive cells were purified from diaphragm, pectoralis and abdominal muscles obtained from animals of both genotypes
	Each Experiment was done with Pax3(GFP)-positive cells purified from 3 independant animals of both genotypes (biological triplicates) and cultured for 3 days.
	Each N correspond to qPCR performed for each gene in triplicate (experimental triplicates).
	Normalization was done with Hprt in each case.
	All animals were females of similar age (6 to 8 weeks-old)

## Sheet: Feuil2
Sup_Fig5B
		Pitx2+/-:Pitx3+/-:Pax3GFP/+			Pitx2-/-:Pitx3-/-:Pax3GFP/+
		Mean	SD	N	Mean	SD	N
	Control	26.3	5.069	3	24.5	4.974	3
	NAC	54.1	8.869	3	53.2	8.602	3
	Pax3(GFP)-positive cells were purified from diaphragm, pectoralis and abdominal muscles obtained from animals of both genotypes
	Each Experiment was done with Pax3(GFP)-positive cells purified from 3 independant animals of both genotypes (biological triplicates) and cultured for 3 days in clonal conditions (1 cell/well) on two 96 well plates per animal
	All animals were females of same age (6 to 8 weeks-old)
	Each N correspond to the mean number of clones counted after 4 days of culture for one animal.

## Sheet: Feuil3
Sup_Fig5C
		Pitx2+/-:Pitx3+/-:Pax3GFP/+:R26RCre-ERT2/+			Pitx2-/-:Pitx3-/-:Pax3GFP/+:R26RCre-ERT2/+			Pitx2-/-:Pitx3-/-:Pax3GFP/+:R26RCre-ERT2/+ + NAC
	D5	Mean	SD	N	Mean	SD	N	Mean	SD	N
	Carbonylated proteins/total proteins	1	0.08	3	2.43	0.21	3	1.56	0.13	3
	Pax3(GFP)-positive cells were purified from diaphragm, pectoralis and abdominal muscles obtained from animals of both genotypes
	Each Experiment was done with Pax3(GFP)-positive cells purified from 3 independant animals of both genotypes (biological triplicates) and cultured for 5 days.
	All animals were females of same age (6 to 8 weeks-old)
	Each N correspond to the ratio carbonylated proteins/total proteins for one animal.

## Sheet: Feuil4
Sup_Fig5E
		Pitx2+/-:Pitx3+/-:Pax3GFP/+:R26RCre-ERT2/+			Pitx2-/-:Pitx3-/-:Pax3GFP/+:R26RCre-ERT2/+
		Mean	SD	N	Mean	SD	N
	IGFBP5	1	0	3	1.776	0.16	3
	Ifitm1	1	0	3	2.42	0.405	3
	Ccl2	1	0	3	1.904	0.42	3
	Ccl5	1	0	3	3.217	0.39	3
	Mdm2	1	0	3	1.86	0.38	3
	LmnB1	1	0	3	0.75	0.054	3
	Pax3(GFP)-positive cells were purified from diaphragm, pectoralis and abdominal muscles obtained from animals of both genotypes
	Each Experiment was done with Pax3(GFP)-positive cells purified from 3 independant animals of both genotypes (biological triplicates) and cultured for 3 days.
	Each N correspond to qPCR performed for each gene in triplicate (experimental triplicate).
	Normalization was done with Hprt in each case.
	All animals were females of same age (6 to 8 weeks-old)

## Sheet: Feuil5
Sup_Fig5F
		Pitx2+/-:Pitx3+/-:Pax3GFP/+:R26RCre-ERT2/+			Pitx2-/-:Pitx3-/-:Pax3GFP/+:R26RCre-ERT2/+			Pitx2-/-:Pitx3-/-:Pax3GFP/+:R26RCre-ERT2/+ + NAC			Pitx2-/-:Pitx3-/-:Pax3GFP/+:R26RCre-ERT2/+ 3%O2
	D5	Mean	SD	N	Mean	SD	N	Mean	SD	N	Mean	SD	N
	SA-bgalactosidase	3.9	0.9	3	27.3	2.3	3	12.22	4.67	3	24.98	4.021	3
	Pax3(GFP)-positive cells were purified from diaphragm, pectoralis and abdominal muscles obtained from animals of both genotypes
	Each Experiment was done with Pax3(GFP)-positive cells purified from 3 independant animals of both genotypes (biological triplicates) and cultured for 5 days.
	All animals were females of same age (6 to 8 weeks-old)
	Each N correspond to the mean % of cells that were counted positive for SA-bgalactosidase activity for one animal.
	For each N, counting was done on three different plates (experimental triplicates)

## Sheet: Feuil6
Sup_Fig5H
		Pax3GFP/+ control (EtOH)			Pax3GFP/+ BSO
	D3	Mean	SD	N	Mean	SD	N
	Cell Rox	12.65	0.94	3	19.44	3.79	3
	Pax3(GFP)-positive cells were purified from diaphragm, pectoralis and abdominal muscles obtained from Pax3GFP/+ animals
	Each Experiment was done with Pax3(GFP)-positive cells purified from 3 independant animals (biological triplicates) and cultured for 3 days.
	All animals were females of same age (6 to 8 weeks-old)
	Each N correspond to the mean Cell Rox fluorescence intensity quantified for one animal.
	For each N, counting was done on two different plates (experimental triplicates)
Sup_Fig5I
		Pax3GFP/+ control (EtOH)			Pax3GFP/+ BSO
	D5	Mean	SD	N	Mean	SD	N
	SA-bGalactosidase	7.2	0.9	3	28.7	3.45	3
	Pax3(GFP)-positive cells were purified from diaphragm, pectoralis and abdominal muscles obtained from Pax3GFP/+ animals
	Each Experiment was done with Pax3(GFP)-positive cells purified from 3 independant animals (biological triplicates) and cultured for 5 days
	All animals were females of same age (6 to 8 weeks-old)
	Each N correspond to the mean % of cells that were counted positive for SA-bgalactosidase activity for one animal.
	For each N, counting was done on three different plates (experimental triplicates)
