# Supplementary material for: The role of Pitx2 and Pitx3 in muscle stem cells gives new insights into P38α MAP kinase and redox regulation of muscle regeneration
Source: eLife. 2018 Aug 14;7:e32991. doi: 10.7554/eLife.32991 (PMC6191287; doi:10.7554/eLife.32991)
Supplement: Figure 5—source data 1. [file elife-32991-fig5-data1.xlsx]

## Sheet: Feuil1
Fig5B
		Pitx2+/-:Pitx3+/-:Pax3GFP/+:R26RCre-ERT2/+			Pitx2-/-:Pitx3-/-:Pax3GFP/+:R26RCre-ERT2/+
	D3	Mean	SD	N	Mean	SD	N
	Ctrl	11.828	1.343	3	7.821	0.541	3
	NAC (10mM)	19.746	2.168	3	16.737	1.757	3
	Pax3(GFP)-positive cells were purified from diaphragm, pectoralis and abdominal muscles obtained from animals of both genotypes
	Each Experiment was done with Pax3(GFP)-positive cells purified from 3 independant animals of both genotypes (biological triplicates) and cultured in clonal conditions (1 cell/well) in two 96 wells plates per animal
	After 3 days in culture, all clones with n≥2 cells were counted. Each N corresponds to the mean number of cells per clone for one animal
	All animals were females of same age (6 to 8 weeks-old)

## Sheet: Feuil2
Fig5C
		Pitx2+/-:Pitx3+/-:Pax3GFP/+:R26RCre-ERT2/+			Pitx2-/-:Pitx3-/-:Pax3GFP/+:R26RCre-ERT2/+			Pitx2-/-:Pitx3-/-:Pax3GFP/+:R26RCre-ERT2/+ + NAC			Pitx2-/-:Pitx3-/-:Pax3GFP/+:R26RCre-ERT2/+ + SB203580
	D3	Mean	SD	N	Mean	SD	N	Mean	SD	N	Mean	SD	N
	EdU	42.7	5.13	3	12.9	3.12	3	30.4	6.02	3	26	2.98	3
	p21	38.1	4.96	3	73.04	6.23	3	46.64	9.82	3	55.05	7.34	3
		Pax3(GFP)-positive cells were purified from diaphragm, pectoralis and abdominal muscles obtained from animals of both genotypes
		Each Experiment was done with Pax3(GFP)-positive cells purified from 3 independant animals of both genotypes (biological triplicates) and cultured for 3 days.
		All animals were females of same age (6 to 8 weeks-old)
		Each N correspond to the mean % of cells that were counted positive for EdU incorporation or for p21 expression for one animal.
		For each N, counting was done on three different plates (experimental triplicates)

## Sheet: Feuil3
Fig5D
		Pitx2+/-:Pitx3+/-:Pax3GFP/+:R26RCre-ERT2/+			Pitx2-/-:Pitx3-/-:Pax3GFP/+:R26RCre-ERT2/+
	D3	Mean	SD	N	Mean	SD	N
	Myogenin	1	0	3	0.349	0.082	3
	Tnnt1	1	0	3	0.54	0.061	3
	Actn2	1	0	3	0.63	0.098	3
	Sspn	1	0	3	0.41	0.032	3
	Experiments were done with 3 independant cultured satellite cells obtained from 3 independant animals (biological triplicate) for each genotype
	Each N correspond to qPCR performed for each gene in triplicate (experimental triplicate).
	Normalization was done with Hprt in each case.
	All animals were females of same age (6 to 8 weeks-old)

## Sheet: Feuil4
Fig5E
		Pitx2+/-:Pitx3+/-:Pax3GFP/+			Pitx2-/-:Pitx3-/-:Pax3GFP/+			Pitx2-/-:Pitx3-/-:Pax3GFP/+ + NAC			Pitx2-/-:Pitx3-/-:Pax3GFP/+ + SB203580
	D5	Mean	SD	N	Mean	SD	N	Mean	SD	N	Mean	SD	N
(i)	Myogenin	78.02	3.5	3	17.85	5.2	3	51.4	7.3	3	24.03	4.76	3
(ii)	g-H2AX	3.7	0.9	3	21.3	2.3	3	6.91	1.84	3	16.98	4.1	3
(iii)	Hp1g foci	4.12	0.75	3	39.23	4.06	3	8.61	5.31	3	12.8	6.02	3
		Pax3(GFP)-positive cells were purified from diaphragm, pectoralis and abdominal muscles obtained from animals of both genotypes
		Each Experiment was done with Pax3(GFP)-positive cells purified from 3 independant animals of both genotypes (biological triplicates)
		All animals were females of same age (6 to 8 weeks-old)
		Each N correspond to the mean % of cells that were counted positive for Myogenin expression or for the presence of HP1g or gH2AX foci after 5 days of culture.
		For each N, counting was done on three different plates (experimental triplicates)
