# Supplementary material for: The role of Pitx2 and Pitx3 in muscle stem cells gives new insights into P38α MAP kinase and redox regulation of muscle regeneration
Source: eLife. 2018 Aug 14;7:e32991. doi: 10.7554/eLife.32991 (PMC6191287; doi:10.7554/eLife.32991)
Supplement: Figure 6—figure supplement 1—source data 1. [file elife-32991-fig6-figsupp1-data1.xlsx]

## Sheet: Feuil2
Sup_Fig6B
		Pax3GFP/+ 20%O2			Pax3GFP/+ 3%O2
	D3	Mean	SD	N	Mean	SD	N
	Ctrl	37.6	6.21	3	32.9	7.04	3
	NAC	52.7	3.14	3	49.5	2.85	3
	SB	41.18	5.02	3	35.36	4.23	3
	NAC/SB	82.6	2.84	3	78.2	3.16	3
	Pax3(GFP)-positive cells were purified from diaphragm, pectoralis and abdominal muscles obtained from Pax3GFP/+ animals
	Each Experiment was done with Pax3(GFP)-positive cells purified from 3 independant animals (biological triplicates) and cultured under 20% or 3% O2
	Each N correspond to the mean % of cells that were counted positive for EdU incorporation after 3 days of culture.
	For each N, counting was done on three different plates (experimental triplicates)
	All animals were females of same age (6 to 8 weeks-old)
Sup_Fig6C
		Pax3GFP/+ 20%O2			Pax3GFP/+ 3%O2
	D3	Mean	SD	N	Mean	SD	N
	Ctrl	8.4	0.97	3	17.3	1.91	3
	NAC	0.8	0.02	3	4.6	0.39	3
	SB	0.2	0.04	3	2.94	0.07	3
	NAC/SB	0	0	3	1.21	0.09	3
	Pax3(GFP)-positive cells were purified from diaphragm, pectoralis and abdominal muscles obtained from Pax3GFP/+ animals
	Each Experiment was done with Pax3(GFP)-positive cells purified from 3 independant animals (biological triplicates) and cultured under 20% or 3% O2
	Each N correspond to the mean % of cells that were counted positive for Myogenin expression after 3 days of culture.
	For each N, counting was done on three different plates (experimental triplicates)
	All animals were females of same age (6 to 8 weeks-old)

## Sheet: Feuil3
Sup_Fig6D
		Pax3GFP/+
	D4	Mean	SD	N
	Ctrl	41.85	10.86	3
	NAC/SB	33.1	3.407	3
	Pax3(GFP)-positive cells were purified from diaphragm, pectoralis and abdominal muscles obtained from Pax3GFP/+ animals
	Each Experiment was done with Pax3(GFP)-positive cells purified from 3 independant animals (biological triplicates) and cultured for 4 days
	For each condition, 2 plates were used for independant Mitotracker quantification (experimental duplicates)
	Each N corresponds to the mean Mitotracker fluorescence intensity for one animal
	All animals were females of same age (6 to 8 weeks-old)
Sup_Fig6E
		Pax3GFP/+
	D4	Mean	SD	N
	Ctrl	18.83	6.27	3
	NAC	6.47	1.559	3
	SB	13.15	3.856	3
	NAC/SB	5.835	1.704	3
	Pax3(GFP)-positive cells were purified from diaphragm, pectoralis and abdominal muscles obtained from Pax3GFP/+ animals
	Each Experiment was done with Pax3(GFP)-positive cells purified from 3 independant animals (biological triplicates) and cultured for 4 days
	For each condition, 2 plates were used for independant Cell Rox quantification (experimental duplicates)
	Each N corresponds to the mean Cell Rox fluorescence intensity for one animal
	All animals were females of same age (6 to 8 weeks-old)

## Sheet: Feuil4
Sup_Fig6F
		Pax3GFP/+
	D4	Mean	SD	N
	Ctrl	24.9	7.23	3
	NAC	58.443	4.25	3
	SB	27.18	9.12	3
	NAC/SB	60.91	8.03	3
	Pax3(GFP)-positive cells were purified from diaphragm, pectoralis and abdominal muscles obtained from Pax3GFP/+ animals
	Each Experiment was done with Pax3(GFP)-positive cells purified from 3 independant animals (biological triplicates) and cultured in clonal conditions (1 cell/well) in two 96 wells plates per animal
	After 4 days in culture, all clones with n≥2 cells were counted. Each N corresponds to the mean number of clone for one animal
	All animals were females of same age (6 to 8 weeks-old)
