# Supplementary material for: The role of Pitx2 and Pitx3 in muscle stem cells gives new insights into P38α MAP kinase and redox regulation of muscle regeneration
Source: eLife. 2018 Aug 14;7:e32991. doi: 10.7554/eLife.32991 (PMC6191287; doi:10.7554/eLife.32991)
Supplement: Figure 6—source data 1. [file elife-32991-fig6-data1.xlsx]

## Sheet: Feuil1
Fig6A, D
		pp38a (Pax3GFP/+ mice)			Myogenin (Pax3GFP/+ mice)
	D4	Mean	SEM	N	Mean	SD	N
	Ctrl	59.72	4.22	3	49.803	4.513	3
	NAC	41.19	4.94	3	34.65	4.57	3
	SB	39.7	1.89	3	31.48	2.82	3
	NAC/SB	26.13	2.66	3	25.547	2.449	3
	Pax3(GFP)-positive cells were purified from diaphragm, pectoralis and abdominal muscles obtained from Pax3GFP/+ animals
	Each Experiment was done with Pax3(GFP)-positive cells purified from 3 independant animals (biological triplicates)
	All animals were females of same age (6 to 8 weeks-old)
	Each N correspond to the mean % of cells that were counted positive for the phosphorylated form of p38a (pp38a, fig6A) or for Myogenin (fig6D) expression after 4 days of culture.
	For each N, counting was done on three different plates (experimental triplicates)

## Sheet: Feuil2
Fig6B
		Pax3GFP/+
	D4	Mean	SD	N
	Ctrl	27.666	6.429	3
	NAC	64.9	11.253	3
	SB	35.356	8.138	3
	NAC/SB	273.833	14.074	3
	Pax3(GFP)-positive cells were purified from diaphragm, pectoralis and abdominal muscles obtained from Pax3GFP/+ animals
	Each Experiment was done with Pax3(GFP)-positive cells purified from 3 independant animals (biological triplicates) and cultured in clonal conditions (1 cell/well) in two 96 wells plates per animal
	After 3 days in culture, all clones with n≥2 cells were counted. Each N corresponds to the mean number of cells per clone for one animal
	All animals were females of same age (6 to 8 weeks-old)

## Sheet: Feuil3
Fig6C
		EdU (Pax3GFP/+ mice)
	D4	Mean	SD	N
	Ctrl	12.16	3.09	4
	NAC	21.84	3.45	4
	SB	19.03	4.01	4
	NAC/SB	45.975	4.881	4
	Pax3(GFP)-positive cells were purified from diaphragm, pectoralis and abdominal muscles obtained from Pax3GFP/+ animals
	Each Experiment was done with Pax3(GFP)-positive cells purified from 3 independant animals (biological triplicates)
	All animals were females of similar age (6 to 8 weeks-old)
	Each N correspond to the mean % of cells that were counted positive for EdU incorporation after 4 days of culture.
	For each N, counting was done on three different plates (experimental triplicates)

## Sheet: Feuil4
Fig6E
		EdU (Pax3GFP/+ mice)			Myogenin (Pax3GFP/+ mice)			p21 (Pax3GFP/+ mice)
	D3	Mean	SD	N	Mean	SD	N	Mean	SD	N
	Ctrl	38.226	4.513	3	19.166	6.487	3	23.7	8.838	3
	NAC/SB	77.654	3.64	3	0	0	3	1.193	0.244	3
	Pax3(GFP)-positive cells were purified from diaphragm, pectoralis and abdominal muscles obtained from Pax3GFP/+ animals
	Each Experiment was done with Pax3(GFP)-positive cells purified from 3 independant animals (biological triplicates)
	All animals were females of same age (6 to 8 weeks-old)
	Each N correspond to the mean % of cells that were counted positive EdU incorporation, or Myogenin or p21 expression after 3 days of culture.
	For each N, counting was done on three different plates (experimental triplicates)

## Sheet: Feuil5
Fig6G
		Dystrophin-positive fibers
	D21	Mean	SD	N
	Freshly isolated	102.833	56.95	3
	3D cultured	9.66	10.63	3
	3D cultured + NAC/SB	121	65.93	4
	Pax3(GFP)-positive cells were purified from diaphragm, pectoralis and abdominal muscles obtained from Pax3GFP/+ animals and used freshly or after 3 days in culture
	Each Experiment was done with 15.000 Pax3(GFP)-positive cells grafted into the Tibialis Anterior of the indicated N of independant animals (biological triplicates)
	All grafted animals were 3 months-old females
	Each N correspond to the mean % of fibers that were counted positive for Dystrophin expression 3 weeks after grafting
Fig6I
		Pax3(GFP)-positive cells
	D21	Mean	SD	N
	Ctrl	187	12.27	2
	NAC	438	113	3
	SB	375	75	3
	NAC/SB	8700	2300	3
	Pax3(GFP)-positive cells were purified from diaphragm, pectoralis and abdominal muscles obtained from Pax3GFP/+ animals and used after 3 days in culture in absence or in presence of NAC, SB or both NAC and SB
	Each Experiment was done with 15.000 Pax3(GFP)-positive cells grafted into the Tibialis Anterior of the indicated N of independant animals (biological triplicates)
	All grafted animals were 3 months-old females
	Each N correspond to the mean number of Pax3(GFP) positive cells that were purified by flow cytometry 6 weeks after grafting and 3 weeks after muscle injury
Fig6K
		Dystrophin-positive fibers
	D42	Mean	SD	N
	Ctrl	68	18.3848	2
	NAC	219.5	12.0208	2
	SB	216.5	0.707107	2
	NAC/SB	504	190.9	3
	Pax3(GFP)-positive cells were purified from diaphragm, pectoralis and abdominal muscles obtained from Pax3GFP/+ animals and used after 3 days in culture in absence or in presence of NAC, SB or both NAC and SB
	Each Experiment was done with 15.000 Pax3(GFP)-positive cells grafted into the Tibialis Anterior of the indicated N of independant animals (biological triplicates)
	All grafted animals were 3 months-old females
	Each N correspond to the mean % of fibers that were counted positive for Dystrophin expression 6 weeks after grafting
