# Supplementary material for: The role of Pitx2 and Pitx3 in muscle stem cells gives new insights into P38α MAP kinase and redox regulation of muscle regeneration
Source: eLife. 2018 Aug 14;7:e32991. doi: 10.7554/eLife.32991 (PMC6191287; doi:10.7554/eLife.32991)
Supplement: Supplementary file 1. [file elife-32991-supp1.docx]

| **Mouse lines** | **Mutation** | **Experiments** |
| --- | --- | --- |
| *Pax3GFP/+* | Constitutive | Satellite cell purification for primary culture or for analysis during regeneration |
| *Pitx3+/-* | Constitutive | Regeneration experiments |
| *Pitx3-/-* | Constitutive | Regeneration experiments |
| *Pitx3+/-:Pax3GFP/+* | Constitutive | Satellite cell purification for primary culture or for analysis during regeneration |
| *Pitx3-/-:Pax3GFP/+* | Constitutive | Satellite cell purification for primary culture or for analysis during regeneration |
| *Pitx2flox/+:R26RCre-ERT2/+* | Inducible | Satellite cell purification for analysis during regeneration |
| *Pitx2flox/flox:R26RCre-ERT2/+* | Inducible | Satellite cell purification for analysis during regeneration |
| *Pitx2flox/+:Pitx3+/-:Pax7Cre-ERT2/+* | Inducible | Regeneration experiments |
| *Pitx2flox/+:Pitx3+/-:R26RCre-ERT2/+:Pax3GFP/+* | Inducible | Regeneration experiments |
| *Pitx2flox/flox:Pitx3flox/-:R26RCre-ERT2/+:Pax3GFP/+* | Inducible | Satellite cell purification for primary culture or for analysis during regeneration |
| *Pitx2flox/+:Pitx3+/-:Pax7Cre-ERT2/+:mdx* | Inducible | Satellite cell purification for primary culture or for analysis during regeneration |
| *Pitx2flox/flox:Pitx3flox/-:Pax7Cre-ERT2/+:mdx* | Inducible | Homeostasis |
| *Rag2-/-:Il2Rb-/-:dmd/dmd* | Constitutive | Homeostasis |
